# Supplementary material for: Impaired Generation of Transit-Amplifying Progenitors in the Adult Subventricular Zone of Cyclin D2 Knockout Mice
Source: MDPI journal article supplement (doi:10.3390/cells11010135), 2022-01-01
Supplement: s1 [file s1]

| Mice                  | Section | No. of B1a<br>(EdU+/-)<br>taken as 100% | B1a<br>(EdU+) |      | mean<br>[%]     | No. of TaPs<br>(EdU+/-)<br>taken as 100% | TaPs<br>(EdU+) |      | mean<br>[%]      |
|-----------------------|---------|-----------------------------------------|---------------|------|-----------------|------------------------------------------|----------------|------|------------------|
|                       |         |                                         | No.           | %    |                 |                                          | No.            | %    |                  |
| WT_#1                 | 1       | 98                                      | 12            | 12.2 | 11.9            | 191                                      | 34             | 17.8 | 15.7             |
|                       | 2       | 73                                      | 10            | 13.7 |                 | 264                                      | 32             | 12.1 |                  |
|                       | 3       | 62                                      | 6             | 9.7  |                 | 205                                      | 35             | 17.1 |                  |
| WT_#2                 | 1       | 326                                     | 50            | 15.3 | 13.4            | 312                                      | 57             | 18.3 | 15.0             |
|                       | 2       | 139                                     | 23            | 16.5 |                 | 284                                      | 26             | 9.2  |                  |
|                       | 3       | 48                                      | 4             | 8.3  |                 | 170                                      | 30             | 17.6 |                  |
| WT_#3                 | 1       | 171                                     | 29            | 17.0 | 13.1            | 309                                      | 45             | 14.6 | 18.5             |
|                       | 2       | 198                                     | 25            | 12.6 |                 | 433                                      | 102            | 23.6 |                  |
|                       | 3       | 114                                     | 11            | 9.6  |                 | 314                                      | 55             | 17.5 |                  |
| mean [%]<br>(± SD)    |         |                                         |               |      | 12.8<br>(± 0.8) |                                          |                |      | 16.4<br>(± 1.9)  |
| KO_#1                 | 1       | 131                                     | 7             | 5.3  | 5.8             | 119                                      | 3              | 2.5  | 2.8              |
|                       | 2       | 65                                      | 5             | 7.7  |                 | 66                                       | 2              | 3.0  |                  |
|                       | 3       | 47                                      | 2             | 4.3  |                 | 36                                       | 1              | 2.8  |                  |
| KO_#2                 | 1       | 66                                      | 0             | 0.0  | 1.7             | 86                                       | 2              | 2.3  | 4.2              |
|                       | 2       | 74                                      | 1             | 1.4  |                 | 69                                       | 7              | 10.1 |                  |
|                       | 3       | 55                                      | 2             | 3.6  |                 | 50                                       | 0              | 0.0  |                  |
| KO_#3                 | 1       | 99                                      | 4             | 4.0  | 4.6             | 45                                       | 0              | 0.0  | 0.0              |
|                       | 2       | 86                                      | 4             | 4.7  |                 | 38                                       | 0              | 0.0  |                  |
|                       | 3       | 59                                      | 3             | 5.1  |                 | 55                                       | 0              | 0.0  |                  |
| mean [%]<br>(± SD)    |         |                                         |               |      | 4.0<br>(± 2.1)  |                                          |                |      | 2.3<br>(± 2.1)   |
| P value<br>(WT vs KO) |         |                                         |               |      | P = 0.0107<br>* |                                          |                |      | P = 0.0010<br>** |
