# Supplementary material for: Impaired Generation of Transit-Amplifying Progenitors in the Adult Subventricular Zone of Cyclin D2 Knockout Mice
Source: MDPI journal article supplement (doi:10.3390/cells11010135), 2022-01-01
Supplement: s1 [file s1]

| Mice                  | Section | No. of cells<br>Hoechst(+) taken as 100% | B1q<br>(EdU-) |      | mean<br>[%]     | B1a<br>(EdU+/-) |      | mean<br>[%]    | B1a<br>(EdU+) |     | mean<br>[%]    | TaPs<br>(EdU+/-) |      | mean<br>[%]      | TaPs<br>(EdU+) |     | mean<br>[%]     | Others<br>(EdU+/-) |      | mean<br>[%]     |
|-----------------------|---------|------------------------------------------|---------------|------|-----------------|-----------------|------|----------------|---------------|-----|----------------|------------------|------|------------------|----------------|-----|-----------------|--------------------|------|-----------------|
|                       |         |                                          | No.           | %    |                 | No.             | %    |                | No.           | %   |                | No.              | %    |                  | No.            | %   |                 | No.                | %    |                 |
| WT_#1                 | 1       | 1417                                     | 191           | 13.5 | 10.7            | 98              | 6.9  | 5.2            | 12            | 0.8 | 0.6            | 191              | 13.5 | 14.5             | 34             | 2.4 | 2.2             | 937                | 66.1 | 69.6            |
|                       | 2       | 1500                                     | 140           | 9.3  |                 | 73              | 4.9  |                | 10            | 0.7 |                | 264              | 17.6 |                  | 32             | 2.1 |                 | 1023               | 68.2 |                 |
|                       | 3       | 1633                                     | 150           | 9.2  |                 | 62              | 3.8  |                | 6             | 0.4 |                | 205              | 12.6 |                  | 35             | 2.1 |                 | 1216               | 74.5 |                 |
| WT_#2                 | 1       | 1840                                     | 379           | 20.6 | 14.9            | 326             | 17.7 | 10.5           | 50            | 2.7 | 1.6            | 312              | 17.0 | 16.8             | 57             | 3.1 | 2.4             | 823                | 44.7 | 57.9            |
|                       | 2       | 1361                                     | 139           | 10.2 |                 | 139             | 10.2 |                | 23            | 1.7 |                | 284              | 20.9 |                  | 26             | 1.9 |                 | 799                | 58.7 |                 |
|                       | 3       | 1364                                     | 188           | 13.8 |                 | 48              | 3.5  |                | 4             | 0.3 |                | 170              | 12.5 |                  | 30             | 2.2 |                 | 958                | 70.2 |                 |
| WT_#3                 | 1       | 2010                                     | 298           | 14.8 | 16.3            | 171             | 8.5  | 8.3            | 29            | 1.4 | 1.1            | 309              | 15.4 | 18.0             | 45             | 2.2 | 3.5             | 1232               | 61.3 | 57.4            |
|                       | 2       | 1814                                     | 245           | 13.5 |                 | 198             | 10.9 |                | 25            | 1.4 |                | 433              | 23.9 |                  | 102            | 5.6 |                 | 938                | 51.7 |                 |
|                       | 3       | 2118                                     | 434           | 20.5 |                 | 114             | 5.4  |                | 11            | 0.5 |                | 314              | 14.8 |                  | 55             | 2.6 |                 | 1256               | 59.3 |                 |
| mean [%]<br>(± SD)    |         |                                          |               |      | 13.9<br>(± 2.9) |                 |      | 8.0<br>(± 2.7) |               |     | 1.1<br>(± 0.5) |                  |      | 16.4<br>(± 1.8)  |                |     | 2.7<br>(± 0.7)  |                    |      | 61.6<br>(± 6.9) |
| KO_#1                 | 1       | 1013                                     | 181           | 17.9 | 16.2            | 131             | 12.9 | 7.7            | 7             | 0.7 | 0.4            | 119              | 11.7 | 7.0              | 3              | 0.3 | 0.2             | 582                | 57.5 | 69.0            |
|                       | 2       | 1082                                     | 149           | 13.8 |                 | 65              | 6.0  |                | 5             | 0.5 |                | 66               | 6.1  |                  | 2              | 0.2 |                 | 802                | 74.1 |                 |
|                       | 3       | 1100                                     | 187           | 17.0 |                 | 47              | 4.3  |                | 2             | 0.2 |                | 36               | 3.3  |                  | 1              | 0.1 |                 | 830                | 75.5 |                 |
| KO_#2                 | 1       | 976                                      | 156           | 16.0 | 15.3            | 66              | 6.8  | 6.1            | 0             | 0.0 | 0.1            | 86               | 8.8  | 6.5              | 2              | 0.2 | 0.3             | 668                | 68.4 | 72.1            |
|                       | 2       | 1151                                     | 165           | 14.3 |                 | 74              | 6.4  |                | 1             | 0.1 |                | 69               | 6.0  |                  | 7              | 0.6 |                 | 843                | 73.2 |                 |
|                       | 3       | 1069                                     | 165           | 15.4 |                 | 55              | 5.1  |                | 2             | 0.2 |                | 50               | 4.7  |                  | 0              | 0.0 |                 | 799                | 74.7 |                 |
| KO_#3                 | 1       | 910                                      | 188           | 20.7 | 15.4            | 99              | 10.9 | 8.3            | 4             | 0.4 | 0.4            | 45               | 4.9  | 4.5              | 0              | 0.0 | 0.0             | 578                | 63.5 | 71.9            |
|                       | 2       | 917                                      | 123           | 13.4 |                 | 86              | 9.4  |                | 4             | 0.4 |                | 38               | 4.1  |                  | 0              | 0.0 |                 | 670                | 73.1 |                 |
|                       | 3       | 1270                                     | 153           | 12.0 |                 | 59              | 4.6  |                | 3             | 0.2 |                | 55               | 4.3  |                  | 0              | 0.0 |                 | 1003               | 79.0 |                 |
| mean [%]<br>(± SD)    |         |                                          |               |      | 15.6<br>(± 0.5) |                 |      | 7.4<br>(± 1.1) |               |     | 0.3<br>(± 0.2) |                  |      | 6.0<br>(± 1.4)   |                |     | 0.2<br>(± 0.1)  |                    |      | 71.0<br>(± 1.7) |
| P value<br>(WT vs KO) |         |                                          |               |      | P = 0.4249      |                 |      | P = 0.7457     |               |     | P = 0.0839     |                  |      | P = 0.0016<br>** |                |     | P = 0.0197<br>* |                    |      | P = 0.1359      |
