# Supplementary figures and images for: Impaired Generation of Transit-Amplifying Progenitors in the Adult Subventricular Zone of Cyclin D2 Knockout Mice
Source: MDPI journal article supplement (doi:10.3390/cells11010135), 2022-01-01

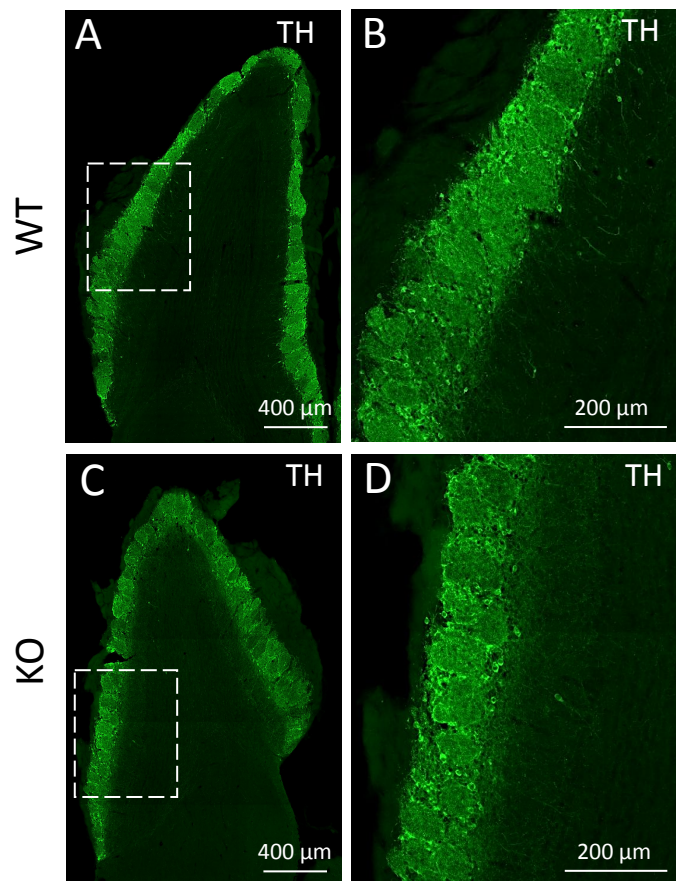

Supplement: s1 [file s1]

WT

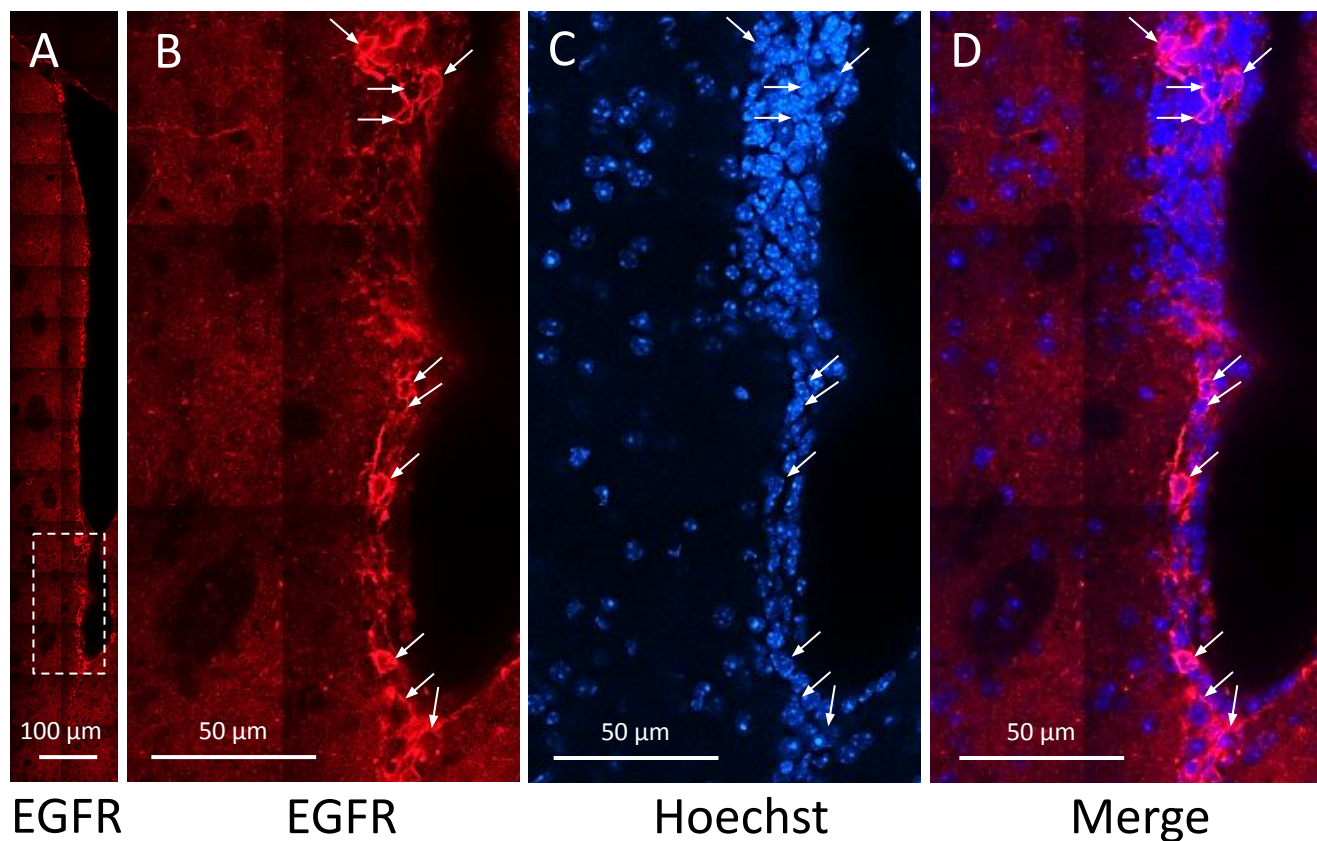

KO

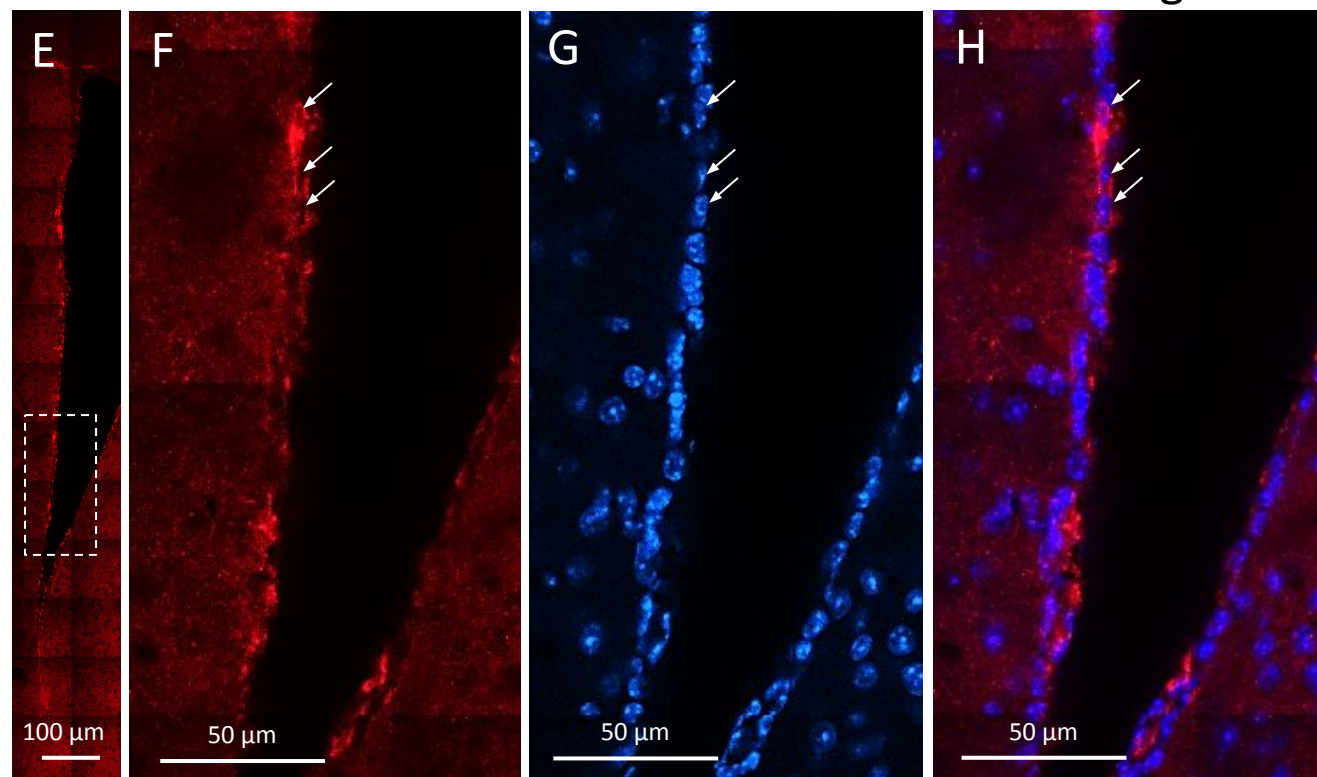

Supplement: s1 [file s1]

A

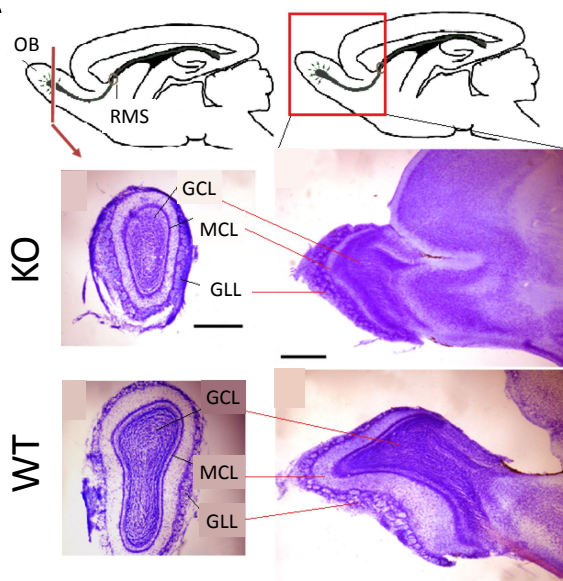

Supplement: s1 [file s1]

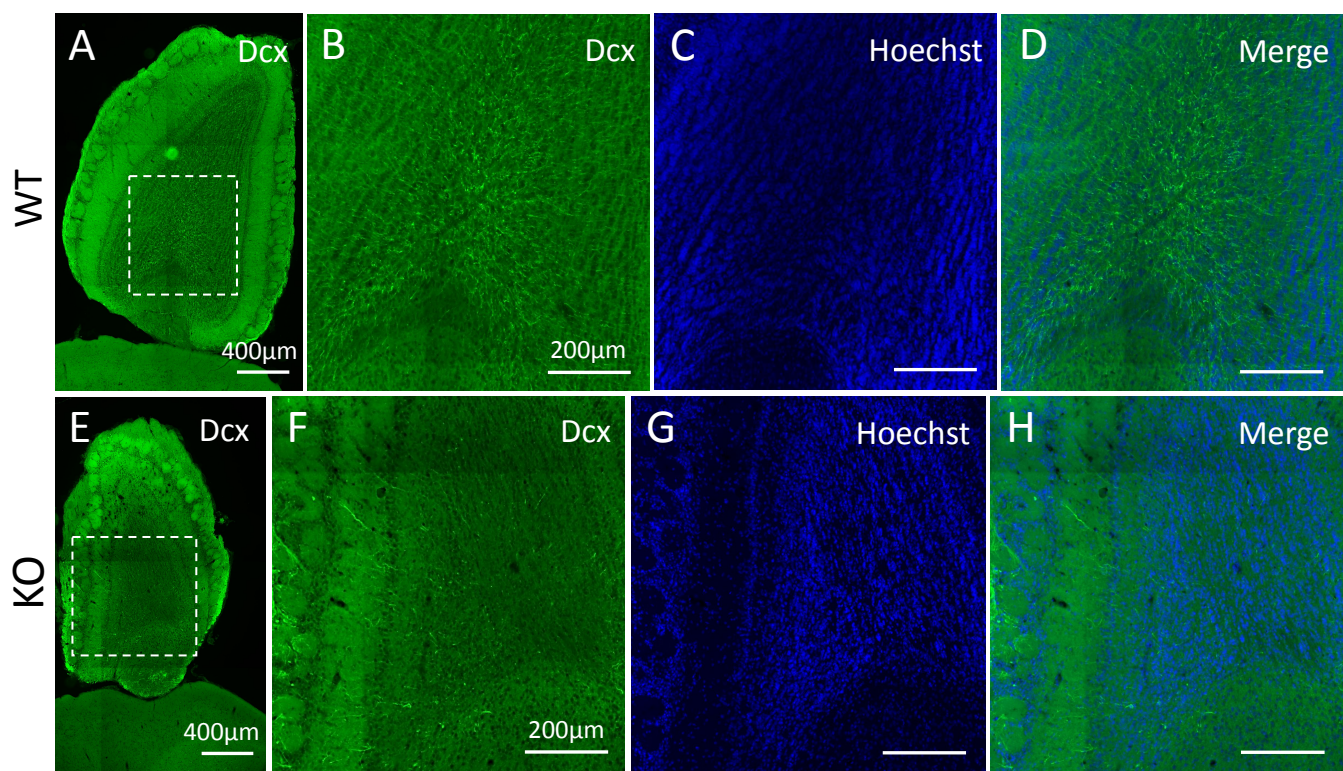

Supplement: s1 [file s1]
